# Supplementary material for: Association of Nongenetic Factors With Breast Cancer Risk in Genetically Predisposed Groups of Women in the UK Biobank Cohort
Source: PubMed Central journal article supplement (PMC7182796; doi:10.1001/jamanetworkopen.2020.3760), 2020-04-24
Supplement: jamanetwopen-3-e203760-s001.pdf [file jamanetwopen-3-e203760-s001.pdf]

## Supplementary Online Content

Al Ajmi K, Lophatananon A, Mekli K, Ollier W, Muir KR. Association of nongenetic factors with breast cancer risk in genetically predisposed groups of women in the UK Biobank cohort. *JAMA Netw Open*. 2020;3(4):e203760.  
doi:10.1001/jamanetworkopen.2020.3760

**eFigure 1.** Number of Participants in Each Filter Step

**eFigure 2.** Distribution of Polygenic Risk Scores

**eTable 1.** Identification Codes for Patients With Breast Cancer and Controls in UK Biobank Cohort

**eTable 2.** 305 SNPs Used in Calculating the Polygenic Risk Scores of the UK Biobank Females

This supplementary material has been provided by the authors to give readers additional information about their work.

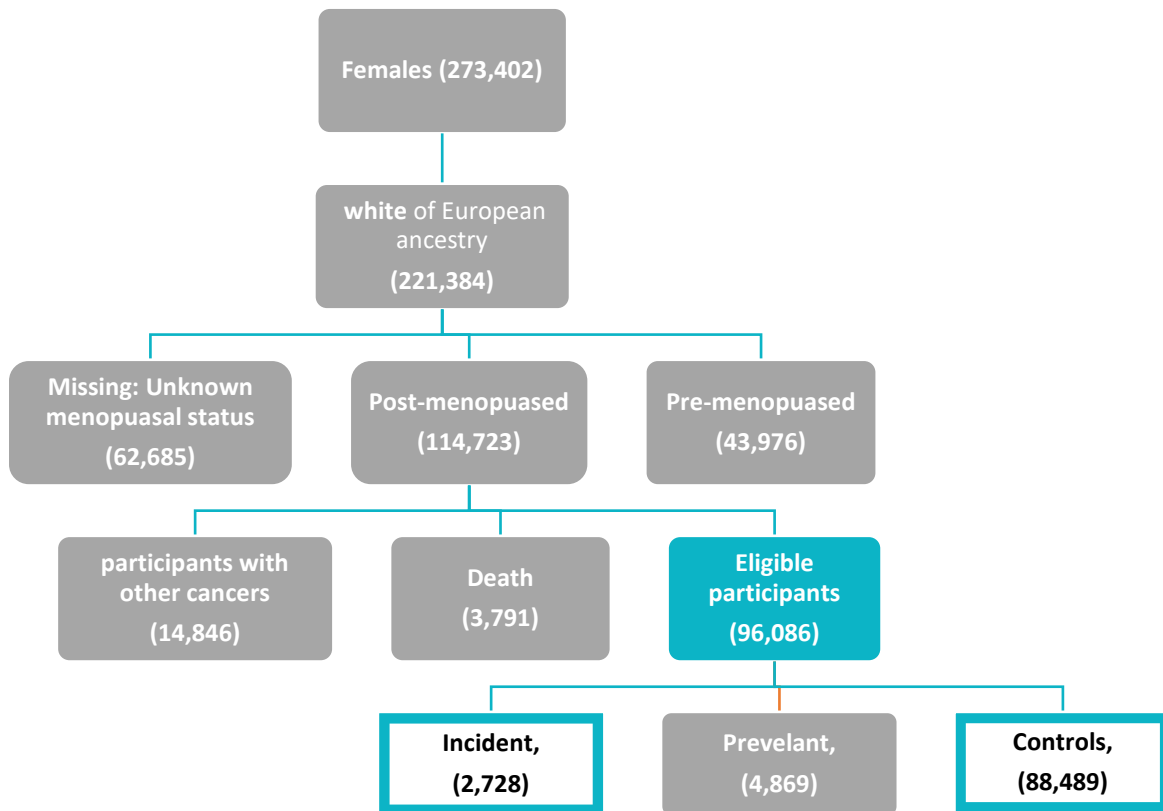

eFigure 1. Number of participants in each filter step.

**eFigure 2.** Distribution of Polygenic Risk Scores

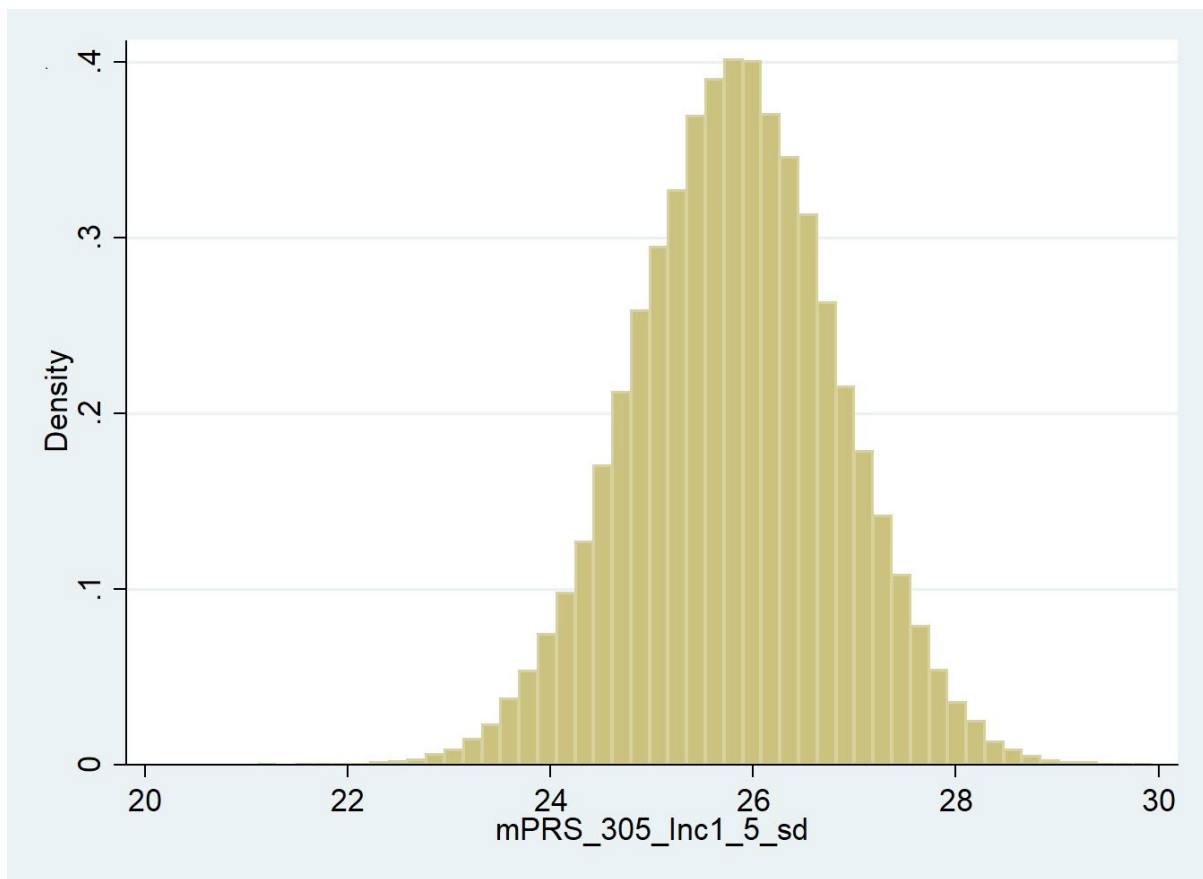

eTable 1. Identification codes for patients with breast cancer and controls in UK biobank cohort

| Sources                      | Breast cancer cases                                                                                |               | Controls                                                           | Participants excluded from the control group                                                                                                                                         |                                                                          |                |
|------------------------------|----------------------------------------------------------------------------------------------------|---------------|--------------------------------------------------------------------|--------------------------------------------------------------------------------------------------------------------------------------------------------------------------------------|--------------------------------------------------------------------------|----------------|
|                              | Incident                                                                                           | Prevalent     |                                                                    | Controls used in the analysis                                                                                                                                                        | Participants with cancer history                                         |                |
|                              |                                                                                                    |               |                                                                    |                                                                                                                                                                                      | Alive participants with cancer                                           | Death registry |
| <b>ICD10</b>                 | Codes start with C50 and its subclasses , C501, C502, C503, C504, C505, C506, C507, C508, and C509 |               | Participants without any other cancer codes from the three sources | Participants with any cancer code (Other than breast cancer) from the three sources either (breast in situ, other in situ, other cancers, and neoplasm of unknown nature or behavior | All dead females were excluded from the analysis regardless of the cause |                |
| <b>ICD9</b>                  | Codes start with 174 and its subclasses 1741, 1742, 1743, 1744, 1745, 1746, 1747, 1748, and 1749   |               |                                                                    |                                                                                                                                                                                      |                                                                          |                |
| <b>Self-reported cancers</b> | 1002                                                                                               |               |                                                                    |                                                                                                                                                                                      |                                                                          |                |
| <b>Frequency (%)</b>         | 2,728 (2.38%)                                                                                      | 4,869 (3.68%) | 88,489 (77.13%)                                                    | 14,846 (12.94%)                                                                                                                                                                      | 3,791 (3.30)                                                             |                |

eTable 2. 305 SNPs used in calculating the polygenic risk scores of the UK biobank females

| eTable 2. 305 SNPs used in calculating the polygenic risk scores of the UK biobank females |                        |           |          |    |       |         |            |                              |             |                  |               |       |                       |
|--------------------------------------------------------------------------------------------|------------------------|-----------|----------|----|-------|---------|------------|------------------------------|-------------|------------------|---------------|-------|-----------------------|
| CHR                                                                                        | rs_id                  | BP        | A1       | A2 | MAF   | QC-test | Info_score | phase3_lkg_id                | rs_number   | reference_allele | effect_allele | eaf   | overall_breast_cancer |
| 1                                                                                          | rs707475               | 7917076   | A        | G  | 0.395 |         | 0.998      | rs707475:7917076:G:A         | rs707475    | G                | A             | 0.390 | -0.041                |
| 1                                                                                          | rs616488               | 10566215  | G        | A  | 0.345 | 106     |            | rs616488:10566215:A:G        | rs616488    | A                | G             | 0.329 | -0.059                |
| 1                                                                                          | rs2992756              | 18807339  | C        | T  | 0.500 |         | 0.999      | rs2992756:18807339:T:C       | rs2992756   | T                | C             | 0.515 | -0.056                |
| 1                                                                                          | rs4233486              | 41380440  | C        | T  | 0.340 |         | 0.986      | rs4233486:41380440:C:T       | rs4233486   | C                | T             | 0.644 | 0.043                 |
| 1                                                                                          | rs114282204            | 41389220  | C        | T  | 0.016 |         | 0.962      | rs114282204:41389220:T:C     | rs114282204 | T                | C             | 0.017 | 0.155                 |
| 1                                                                                          | 1:46670206 TC T        | 46670206  | T        | TC | 0.302 |         | 0.988      | rs144105764:46670206:TC:T    | rs144105764 | TC               | T             | 0.297 | 0.045                 |
| 1                                                                                          | 1:51467096 CT C        | 51467096  | C        | CT | 0.495 |         | 0.905      | rs56168262:51467096:CT:C     | rs56168262  | CT               | C             | 0.480 | 0.037                 |
| 1                                                                                          | rs17426269             | 88156923  | A        | G  | 0.151 |         | 0.980      | rs17426269:88156923:G:A      | rs17426269  | G                | A             | 0.149 | 0.049                 |
| 1                                                                                          | rs2151842              | 88428199  | A        | C  | 0.240 |         | 0.999      | rs2151842:88428199:C:A       | rs2151842   | C                | A             | 0.248 | -0.039                |
| 1                                                                                          | rs612683               | 100880328 | T        | A  | 0.401 |         | 0.984      | rs612683:100880328:A:T       | rs612683    | A                | T             | 0.410 | 0.037                 |
| 1                                                                                          | 1:110198129_CAA<br>A_C | 110198129 | CAA<br>A | C  | 0.206 |         | 0.950      | rs56097627:110198129:CAA:A:C | rs56097627  | CAA              | C             | 0.776 | 0.046                 |
| 1                                                                                          | rs7513707              | 114445880 | A        | G  | 0.174 |         | 0.999      | rs7513707:114445880:G:A      | rs7513707   | G                | A             | 0.166 | 0.062                 |
| 1                                                                                          | rs12406858             | 118141492 | C        | A  | 0.252 |         | 0.989      | rs12406858:118141492:A:C     | rs12406858  | A                | C             | 0.266 | 0.045                 |
| 1                                                                                          | rs637868               | 120257110 | T        | C  | 0.471 |         | 0.995      | rs637868:120257110:T:C       | rs637868    | T                | C             | 0.531 | 0.039                 |
| 1                                                                                          | rs11249433             | 121280613 | G        | A  | 0.417 | 106     |            | rs11249433:121280613:A:G     | rs11249433  | A                | G             | 0.405 | 0.088                 |
| 1                                                                                          | rs111458676            | 121287994 | G        | A  | 0.087 |         | 0.971      | rs111458676:121287994:A:G    | rs111458676 | A                | G             | 0.106 | -0.067                |
| 1                                                                                          | rs143384623            | 145604302 | CT       | C  | 0.346 |         | 0.963      | rs72127681:145604302:C:C     | rs143384623 | C                | CT            | 0.352 | -0.040                |
| 1                                                                                          | rs11205303             | 149906413 | C        | T  | 0.410 | 106     |            | rs11205303:149906413:T:C     | rs11205303  | T                | C             | 0.402 | 0.055                 |
| 1                                                                                          | rs12091730             | 155556971 | A        | G  | 0.232 |         | 0.996      | rs12091730:155556971:G:A     | rs12091730  | G                | A             | 0.230 | 0.050                 |
| 1                                                                                          | rs761575824            | 168171052 | C        | CA | 0.086 |         | 0.927      | rs139315904:168171052:CA:C   | rs139315904 | CA               | C             | 0.110 | -0.068                |
| 1                                                                                          | rs11463354             | 172328767 | TA       | T  | 0.311 |         | 0.953      | rs11463354:172328767:T:T     | rs11463354  | T                | TA            | 0.331 | -0.044                |
| 1                                                                                          | rs35383942             | 201437832 | T        | C  | 0.063 | 106     |            | rs35383942:201437832:C:T     | rs35383942  | C                | T             | 0.056 | 0.092                 |
| 1                                                                                          | rs6686987              | 202184600 | T        | C  | 0.403 |         | 0.995      | rs6686987:202184600:C:T      | rs6686987   | C                | T             | 0.399 | -0.007                |
| 1                                                                                          | rs7514172              | 203770448 | A        | T  | 0.277 |         | 1.000      | rs7514172:203770448:T:A      | rs7514172   | T                | A             | 0.272 | 0.050                 |

eTable 2. 305 SNPs used in calculating the polygenic risk scores of the UK biobank females

| CHR | rs_id            | BP        | A1 | A2                            | MAF   | QC-test | Info_score | phase3_1kg_id                            | rs_number   | reference_allele | effect_allele                 | eaf   | overall_breast_cancer |
|-----|------------------|-----------|----|-------------------------------|-------|---------|------------|------------------------------------------|-------------|------------------|-------------------------------|-------|-----------------------|
| 1   | rs11268668       | 204502514 | T  | TTC<br>TGA<br>AAC<br>AGG<br>G | 0.214 |         | 0.979      | rs11268668:204502514:T:T<br>TCTGAAACAGGG | rs11268668  | T                | TTC<br>TGA<br>AAC<br>AGG<br>G | 0.803 | -0.032                |
| 1   | rs2785646        | 208076291 | A  | G                             | 0.350 |         | 0.994      | rs2785646:208076291:G:A                  | rs2785646   | G                | A                             | 0.334 | -0.037                |
| 1   | rs2576261        | 217053815 | G  | T                             | 0.326 |         | 0.981      | rs2576261:217053815:T:G                  | rs2576261   | T                | G                             | 0.328 | 0.042                 |
| 1   | rs11117758       | 217220574 | A  | G                             | 0.210 |         | 0.985      | rs11117758:217220574:G:A                 | rs11117758  | G                | A                             | 0.211 | -0.044                |
| 1   | rs11118563       | 220671050 | T  | C                             | 0.229 |         | 0.980      | rs11118563:220671050:C:T                 | rs11118563  | C                | T                             | 0.242 | 0.042                 |
| 1   | rs72755295       | 242034263 | G  | A                             | 0.033 |         | 0.985      | rs72755295:242034263:A:G                 | rs72755295  | A                | G                             | 0.031 | 0.143                 |
| 2   | rs78425380       | 10138983  | C  | T                             | 0.100 |         | 0.940      | rs78425380:10138983:T:C                  | rs78425380  | T                | C                             | 0.116 | 0.060                 |
| 2   | rs6743383        | 19315675  | T  | A                             | 0.440 |         | 0.997      | rs6743383:19315675:T:A                   | rs6743383   | T                | A                             | 0.560 | -0.033                |
| 2   | rs6725517        | 25129473  | G  | A                             | 0.431 |         | 0.999      | rs6725517:25129473:A:G                   | rs6725517   | A                | G                             | 0.408 | -0.043                |
| 2   | rs12472404       | 29179452  | C  | G                             | 0.232 |         | 0.995      | rs12472404:29179452:G:C                  | rs12472404  | G                | C                             | 0.229 | -0.007                |
| 2   | rs4322799        | 29615233  | C  | T                             | 0.231 |         | 0.971      | rs4322799:29615233:T:C                   | rs4322799   | T                | C                             | 0.262 | -0.043                |
| 2   | rs553796823      | 39699510  | CT | C                             | 0.452 |         | 0.938      | rs11406722:39699510:C:CT                 | rs11406722  | C                | CT                            | 0.466 | -0.040                |
| 2   | rs6756513        | 70172587  | A  | G                             | 0.283 |         | 0.990      | rs6756513:70172587:G:A                   | rs6756513   | G                | A                             | 0.279 | -0.041                |
| 2   | rs1036759        | 88358825  | C  | G                             | 0.301 |         | 0.972      | rs1036759:88358825:G:C                   | rs1036759   | G                | C                             | 0.308 | 0.047                 |
| 2   | rs6746250        | 121058254 | A  | G                             | 0.312 |         | 0.998      | rs6746250:121058254:A:G                  | rs6746250   | A                | G                             | 0.705 | -0.033                |
| 2   | rs17625845       | 121089731 | C  | T                             | 0.195 | 106     |            | rs17625845:121089731:T:C                 | rs17625845  | T                | C                             | 0.194 | -0.043                |
| 2   | rs10164550       | 121159205 | A  | G                             | 0.354 |         | 0.968      | rs10164550:121159205:G:A                 | rs10164550  | G                | A                             | 0.353 | -0.044                |
| 2   | rs10179592       | 121246568 | T  | C                             | 0.098 |         | 0.998      | rs10179592:121246568:T:C                 | rs10179592  | T                | C                             | 0.897 | 0.099                 |
| 2   | rs17726078       | 172974566 | G  | C                             | 0.479 | 106     |            | rs17726078:172974566:C:G                 | rs17726078  | C                | G                             | 0.474 | -0.047                |
| 2   | rs1550622        | 174212910 | A  | G                             | 0.167 |         | 0.984      | rs1550622:174212910:A:G                  | rs1550622   | A                | G                             | 0.845 | 0.059                 |
| 2   | rs2356656        | 192381934 | C  | T                             | 0.126 |         | 0.995      | rs2356656:192381934:C:T                  | rs2356656   | C                | T                             | 0.859 | 0.032                 |
| 2   | rs10197246       | 202204741 | T  | C                             | 0.266 |         | 0.997      | rs10197246:202204741:T:C                 | rs10197246  | T                | C                             | 0.721 | -0.049                |
| 2   | rs4442975        | 217920769 | G  | T                             | 0.488 |         | 0.989      | rs4442975:217920769:G:T                  | rs4442975   | G                | T                             | 0.500 | -0.132                |
| 2   | 2:217955896_GA_G | 217955896 | G  | GA                            | 0.035 |         | 0.980      | 2:217955896:GA:G                         | rs572022984 | GA               | G                             | 0.038 | -0.202                |
| 2   | rs11693806       | 218292158 | C  | G                             | 0.265 |         | 0.994      | rs11693806:218292158:C:G                 | rs11693806  | C                | G                             | 0.731 | -0.076                |
| 2   | rs3791977        | 218714845 | A  | G                             | 0.399 |         | 0.955      | rs3791977:218714845:G:A                  | rs3791977   | G                | A                             | 0.392 | -0.043                |
| 2   | rs4676356        | 241388857 | C  | A                             | 0.028 | 106     |            | rs4676356:241388857:C:A                  | rs4676356   | C                | A                             | 0.977 | -0.123                |

eTable 2. 305 SNPs used in calculating the polygenic risk scores of the UK biobank females

| CHR | rs_id             | BP        | A1              | A2              | MAF   | QC-test | Info_score | phase3_1kg_id                       | rs_number   | reference_allele | effect_allele | eaf   | overall_breast_cancer |
|-----|-------------------|-----------|-----------------|-----------------|-------|---------|------------|-------------------------------------|-------------|------------------|---------------|-------|-----------------------|
| 3   | rs6762558         | 4742251   | G               | A               | 0.412 |         | 0.997      | rs6762558:4742251:A:G               | rs6762558   | A                | G             | 0.380 | 0.062                 |
| 3   | rs552647          | 27353716  | C               | A               | 0.475 |         | 0.999      | rs552647:27353716:C:A               | rs552647    | C                | A             | 0.526 | 0.075                 |
| 3   | rs62255657        | 27388664  | G               | C               | 0.253 |         | 0.994      | rs62255657:27388664:C:G             | rs62255657  | C                | G             | 0.274 | 0.050                 |
| 3   | rs112476261       | 29294845  | T               | C               | 0.015 |         | 0.972      | rs112476261:29294845:C:T            | rs112476261 | C                | T             | 0.016 | -0.128                |
| 3   | rs17838698        | 30684907  | T               | C               | 0.285 | 106     |            | rs17838698:30684907:C:T             | rs17838698  | C                | T             | 0.298 | 0.059                 |
| 3   | rs56387622        | 46888198  | C               | T               | 0.097 |         | 0.988      | rs56387622:46888198:T:C             | rs56387622  | T                | C             | 0.103 | -0.081                |
| 3   | rs371314787       | 49709912  | CT              | C               | 0.269 |         | 0.957      | 3:49709912:C:CT                     | rs371314787 | C                | CT            | 0.287 | -0.037                |
| 3   | rs138866686       | 55970777  | AT              | A               | 0.024 |         | 0.966      | rs138866686:55970777:A:A<br>T       | rs138866686 | A                | AT            | 0.031 | -0.120                |
| 3   | rs2886671         | 59373745  | T               | C               | 0.421 |         | 0.996      | rs2886671:59373745:C:T              | rs2886671   | C                | T             | 0.429 | -0.039                |
| 3   | rs9825432         | 71620370  | T               | G               | 0.360 |         | 0.996      | rs9825432:71620370:T:G              | rs9825432   | T                | G             | 0.638 | -0.037                |
| 3   | rs13066793        | 87037543  | G               | A               | 0.090 | 106     |            | rs13066793:87037543:A:G             | rs13066793  | A                | G             | 0.092 | -0.072                |
| 3   | rs639355          | 99403877  | A               | G               | 0.480 |         | 0.996      | rs639355:99403877:G:A               | rs639355    | G                | A             | 0.485 | -0.038                |
| 3   | 3:141112859_CTT_C | 141112859 | C               | CTT             | 0.431 |         | 0.997      | rs34207738:141112859:CTT<br>:C      | rs34207738  | CTT              | C             | 0.415 | 0.055                 |
| 3   | rs58058861        | 172285237 | A               | G               | 0.220 |         | 0.990      | rs58058861:172285237:G:A            | rs58058861  | G                | A             | 0.213 | 0.042                 |
| 3   | rs9882792         | 189774456 | T               | C               | 0.221 |         | 0.985      | rs9882792:189774456:C:T             | rs9882792   | C                | T             | 0.224 | -0.048                |
| 4   | rs10012017        | 38784633  | T               | G               | 0.200 |         | 0.996      | rs10012017:38784633:G:T             | rs10012017  | G                | T             | 0.249 | 0.049                 |
| 4   | rs17014016        | 89240476  | A               | G               | 0.443 | 106     |            | rs17014016:89240476:G:A             | rs17014016  | G                | A             | 0.440 | 0.035                 |
| 4   | rs775780062       | 92594859  | T               | TTC<br>TTT<br>C | 0.443 |         | 0.950      | rs147404208:92594859:TTC<br>TTTC:T  | rs147404208 | TTCTT<br>TC      | T             | 0.445 | -0.041                |
| 4   | rs62331150        | 106069013 | T               | G               | 0.203 |         | 0.998      | rs62331150:106069013:G:T            | rs62331150  | G                | T             | 0.229 | 0.047                 |
| 4   | rs56039025        | 143467195 | T               | C               | 0.113 |         | 0.999      | rs56039025:143467195:C:T            | rs56039025  | C                | T             | 0.112 | -0.057                |
| 4   | rs745707748       | 151218296 | CAT<br>ATT<br>T | C               | 0.360 |         | 0.994      | rs138786872:151218296:CA<br>TATTT:C | rs138786872 | CATA<br>TTT      | C             | 0.653 | 0.039                 |
| 4   | rs28436676        | 175842495 | A               | G               | 0.119 |         | 0.998      | rs28436676:175842495:G:A            | rs28436676  | G                | A             | 0.116 | -0.090                |
| 4   | rs62334414        | 175847436 | A               | C               | 0.340 |         | 0.987      | rs62334414:175847436:C:A            | rs62334414  | C                | A             | 0.343 | 0.035                 |
| 5   | rs62641919        | 345109    | C               | T               | 0.059 |         | 0.988      | rs116095464:345109:T:C              | rs116095464 | T                | C             | 0.054 | 0.084                 |
| 5   | rs10069690        | 1279790   | T               | C               | 0.257 | 106     |            | rs10069690:1279790:C:T              | rs10069690  | C                | T             | 0.259 | 0.062                 |
| 5   | rs3215401         | 1296255   | AG              | A               | 0.314 |         | 0.996      | rs3215401:1296255:A:AG              | rs3215401   | A                | AG            | 0.307 | -0.055                |

eTable 2. 305 SNPs used in calculating the polygenic risk scores of the UK biobank females

| CHR | rs_id           | BP        | A1 | A2  | MAF   | QC-test | Info_score | phase3_1kg_id              | rs_number   | reference_allele | effect_allele | eaf   | overall_breast_cancer |
|-----|-----------------|-----------|----|-----|-------|---------|------------|----------------------------|-------------|------------------|---------------|-------|-----------------------|
| 5   | rs62329727      | 1353077   | C  | T   | 0.011 |         | 0.934      | rs62329727:1353077:T:C     | rs62329727  | T                | C             | 0.012 | 0.155                 |
| 5   | rs4866496       | 2777029   | A  | G   | 0.422 |         | 0.996      | rs4866496:2777029:G:A      | rs4866496   | G                | A             | 0.414 | 0.039                 |
| 5   | rs17611291      | 16231194  | G  | C   | 0.449 |         | 0.994      | rs17611291:16231194:G:C    | rs17611291  | G                | C             | 0.559 | -0.043                |
| 5   | rs770436441     | 32579616  | T  | TCA | 0.474 |         | 0.994      | rs35130031:32579616:TCA:T  | rs35130031  | TCA              | T             | 0.484 | 0.036                 |
| 5   | rs138335056     | 44508264  | GT | G   | 0.111 |         | 0.987      | rs58166936:44508264:G:GT   | rs58166936  | G                | GT            | 0.127 | -0.118                |
| 5   | rs187108781     | 44619502  | G  | A   | 0.154 |         | 0.978      | rs187108781:44619502:A:G   | rs187108781 | A                | G             | 0.155 | -0.110                |
| 5   | rs4613718       | 44649944  | C  | T   | 0.392 |         | 0.983      | rs4613718:44649944:C:T     | rs4613718   | C                | T             | 0.601 | 0.049                 |
| 5   | rs10941679      | 44706498  | G  | A   | 0.252 |         | 0.979      | rs10941679:44706498:A:G    | rs10941679  | A                | G             | 0.248 | 0.050                 |
| 5   | rs17343002      | 44853593  | C  | G   | 0.314 | 106     |            | rs17343002:44853593:G:C    | rs17343002  | G                | C             | 0.308 | -0.034                |
| 5   | rs553874618     | 55662540  | CT | C   | 0.355 |         | 0.974      | rs113803968:55662540:C:C:T | rs113803968 | C                | CT            | 0.363 | -0.046                |
| 5   | rs889310        | 55965167  | C  | T   | 0.438 |         | 0.988      | rs889310:55965167:C:T      | rs889310    | C                | T             | 0.558 | 0.039                 |
| 5   | rs16886165      | 56023083  | G  | T   | 0.163 | 106     |            | rs16886165:56023083:T:G    | rs16886165  | T                | G             | 0.158 | 0.137                 |
| 5   | rs76250845      | 56042972  | T  | C   | 0.059 |         | 0.995      | rs76250845:56042972:C:T    | rs76250845  | C                | T             | 0.052 | 0.087                 |
| 5   | rs11949391      | 56045081  | C  | T   | 0.165 |         | 0.992      | rs11949391:56045081:T:C    | rs11949391  | T                | C             | 0.166 | -0.056                |
| 5   | rs113778879     | 58241712  | C  | T   | 0.429 |         | 0.944      | rs113778879:58241712:C:T   | rs113778879 | C                | T             | 0.575 | -0.043                |
| 5   | rs3010266       | 71965007  | A  | G   | 0.257 |         | 0.975      | rs3010266:71965007:G:A     | rs3010266   | G                | A             | 0.257 | -0.041                |
| 5   | rs157557        | 73234583  | C  | T   | 0.323 |         | 0.956      | rs157557:73234583:T:C      | rs157557    | T                | C             | 0.321 | -0.036                |
| 5   | rs767431357     | 77155397  | G  | GT  | 0.344 |         | 0.983      | rs144028731:77155397:GT:G  | rs144028731 | GT               | G             | 0.347 | -0.041                |
| 5   | rs34525310      | 79180995  | GA | G   | 0.177 |         | 0.997      | rs34525310:79180995:G:G:A  | rs34525310  | G                | GA            | 0.176 | 0.033                 |
| 5   | 5:81512947_TA_T | 81512947  | T  | TA  | 0.249 |         | 0.999      | rs146817970:81512947:TA:T  | rs146817970 | TA               | T             | 0.250 | -0.060                |
| 5   | rs332529        | 90789470  | A  | G   | 0.148 |         | 0.986      | rs332529:90789470:G:A      | rs332529    | G                | A             | 0.158 | -0.056                |
| 5   | rs17157372      | 104300273 | T  | G   | 0.167 |         | 0.987      | rs17157372:104300273:G:T   | rs17157372  | G                | T             | 0.181 | -0.049                |
| 5   | rs335160        | 122478676 | C  | A   | 0.250 |         | 0.998      | rs335160:122478676:C:A     | rs335160    | C                | A             | 0.745 | -0.039                |
| 5   | rs1428387       | 122705244 | T  | C   | 0.023 |         | 0.997      | rs1428387:122705244:C:T    | rs1428387   | C                | T             | 0.031 | 0.094                 |
| 5   | rs6860806       | 131640536 | A  | G   | 0.451 |         | 0.990      | rs6860806:131640536:A:G    | rs6860806   | A                | G             | 0.543 | 0.039                 |
| 5   | rs6596100       | 132407058 | T  | C   | 0.237 |         | 0.997      | rs6596100:132407058:C:T    | rs6596100   | C                | T             | 0.245 | -0.039                |
| 5   | rs1432679       | 158244083 | C  | T   | 0.448 | 106     |            | rs1432679:158244083:C:T    | rs1432679   | C                | T             | 0.568 | -0.068                |



eTable 2. 305 SNPs used in calculating the polygenic risk scores of the UK biobank females

| CHR | rs_id                   | BP        | A1               | A2  | MAF   | QC-test | Info_score | phase3_1kg_id                    | rs_number   | reference_allele | effect_allele | eaf   | overall_breast_cancer |
|-----|-------------------------|-----------|------------------|-----|-------|---------|------------|----------------------------------|-------------|------------------|---------------|-------|-----------------------|
| 5   | rs10074269              | 169591460 | C                | T   | 0.342 |         | 0.998      | rs10074269:169591460:T:C         | rs10074269  | T                | C             | 0.335 | 0.041                 |
| 5   | rs6864691               | 173358154 | A                | G   | 0.422 |         | 0.995      | rs6864691:173358154:G:A          | rs6864691   | G                | A             | 0.407 | 0.037                 |
| 5   | rs4868701               | 176134882 | T                | C   | 0.458 |         | 0.988      | rs4868701:176134882:T:C          | rs4868701   | T                | C             | 0.542 | 0.036                 |
| 6   | rs418053                | 13713366  | G                | C   | 0.425 |         | 0.995      | rs418053:13713366:G:C            | rs418053    | G                | C             | 0.569 | -0.055                |
| 6   | rs3819405               | 16399557  | T                | C   | 0.331 | 106     |            | rs3819405:16399557:C:T           | rs3819405   | C                | T             | 0.330 | -0.037                |
| 6   | rs12211970              | 18783140  | G                | A   | 0.390 |         | 0.998      | rs12211970:18783140:G:A          | rs12211970  | G                | A             | 0.620 | 0.033                 |
| 6   | rs769485514             | 20537845  | C                | CA  | 0.497 |         | 0.895      | 6:20537845:CA:C                  | rs543824204 | CA               | C             | 0.473 | -0.039                |
| 6   | rs9358466               | 21923810  | C                | T   | 0.433 |         | 0.996      | rs9358466:21923810:T:C           | rs9358466   | T                | C             | 0.430 | -0.032                |
| 6   | rs34196306              | 27425644  | C                | G   | 0.111 |         | 0.980      | rs34196306:27425644:G:C          | rs34196306  | G                | C             | 0.082 | -0.074                |
| 6   | rs111342015             | 43227141  | A                | G   | 0.100 | 106     |            | rs111342015:43227141:G:A         | rs111342015 | G                | A             | 0.099 | -0.064                |
| 6   | rs10623112              | 82263549  | A                | AAT | 0.410 |         | 0.946      | 6:82263549:AAT:A                 | rs796893180 | AAT              | A             | 0.426 | 0.048                 |
| 6   | 6:85912194_CAA_C        | 85912194  | C                | CAA | 0.063 |         | 0.973      | rs146519950:85912194:CA A:C      | rs146519950 | CAA              | C             | 0.060 | 0.076                 |
| 6   | rs73754909              | 87803819  | C                | T   | 0.274 |         | 0.987      | rs73754909:87803819:T:C          | rs73754909  | T                | C             | 0.277 | 0.038                 |
| 6   | rs55941023              | 130341728 | C                | CT  | 0.299 |         | 0.985      | rs55941023:130341728:C:C T       | rs55941023  | C                | CT            | 0.712 | 0.047                 |
| 6   | rs2121348               | 149595505 | C                | T   | 0.199 |         | 0.996      | rs2121348:149595505:T:C          | rs2121348   | T                | C             | 0.206 | -0.048                |
| 6   | rs6913578               | 151949806 | C                | A   | 0.323 |         | 0.998      | rs6913578:151949806:A:C          | rs6913578   | A                | C             | 0.308 | 0.070                 |
| 6   | rs60954078              | 151955914 | G                | A   | 0.071 |         | 0.997      | rs60954078:151955914:A:G         | rs60954078  | A                | G             | 0.071 | 0.145                 |
| 6   | 6:152022664_CAA_AAAAA C | 152022664 | CAA<br>AAA<br>AA | C   | 0.375 |         | 0.919      | rs57589542:152022664:CA AAAAAA:C | rs57589542  | CAAA<br>AAAA     | C             | 0.612 | 0.014                 |
| 6   | rs851984                | 152023191 | A                | G   | 0.391 |         | 0.989      | rs851984:152023191:G:A           | rs851984    | G                | A             | 0.397 | 0.063                 |
| 6   | rs6904031               | 152055978 | T                | A   | 0.056 |         | 0.984      | rs6904031:152055978:A:T          | rs6904031   | A                | T             | 0.063 | 0.074                 |
| 6   | rs910416                | 152432902 | C                | T   | 0.489 |         | 0.991      | rs910416:152432902:C:T           | rs910416    | C                | T             | 0.515 | 0.065                 |
| 6   | rs9364472               | 169006947 | C                | G   | 0.493 |         | 0.982      | rs9364472:169006947:C:G          | rs9364472   | C                | G             | 0.520 | -0.031                |
| 6   | rs6940159               | 170332621 | T                | C   | 0.368 |         | 0.945      | rs6940159:170332621:T:C          | rs6940159   | T                | C             | 0.616 | 0.037                 |
| 7   | rs7971                  | 21940960  | G                | A   | 0.358 |         | 0.993      | rs7971:21940960:A:G              | rs7971      | A                | G             | 0.352 | -0.047                |
| 7   | rs289997                | 25569548  | T                | C   | 0.145 |         | 0.993      | rs289997:25569548:C:T            | rs289997    | C                | T             | 0.167 | -0.049                |
| 7   | rs74765302              | 28869017  | A                | G   | 0.108 |         | 0.991      | rs74765302:28869017:G:A          | rs74765302  | G                | A             | 0.107 | -0.057                |
| 7   | rs13244925              | 55192256  | A                | C   | 0.432 |         | 0.995      | rs13244925:55192256:A:C          | rs13244925  | A                | C             | 0.550 | -0.035                |
| 7   | rs17268829              | 94113799  | C                | T   | 0.298 |         | 0.998      | rs17268829:94113799:T:C          | rs17268829  | T                | C             | 0.279 | 0.045                 |

eTable 2. 305 SNPs used in calculating the polygenic risk scores of the UK biobank females

| CHR | rs_id           | BP        | A1 | A2 | MAF   | QC-test | Info_score | phase3_1kg_id                 | rs_number   | reference_allele | effect_allele | eaf   | overall_breast_cancer |
|-----|-----------------|-----------|----|----|-------|---------|------------|-------------------------------|-------------|------------------|---------------|-------|-----------------------|
| 7   | rs4439053       | 98005235  | A  | G  | 0.169 |         | 0.982      | rs4439053:98005235:G:A        | rs4439053   | G                | A             | 0.163 | -0.047                |
| 7   | rs111963714     | 99948655  | G  | T  | 0.209 |         | 0.989      | rs111963714:99948655:T:G      | rs111963714 | T                | G             | 0.211 | 0.042                 |
| 7   | rs71559437      | 101552440 | A  | G  | 0.132 |         | 0.976      | rs71559437:101552440:G:A      | rs71559437  | G                | A             | 0.126 | -0.057                |
| 7   | rs7800548       | 102481842 | C  | T  | 0.338 |         | 0.999      | rs7800548:102481842:T:C       | rs7800548   | T                | C             | 0.342 | 0.042                 |
| 7   | rs12706954      | 130656911 | T  | C  | 0.382 |         | 0.950      | rs12706954:130656911:C:T      | rs12706954  | C                | T             | 0.373 | -0.048                |
| 7   | rs68056147      | 130674481 | A  | G  | 0.301 |         | 0.969      | rs68056147:130674481:G:A      | rs68056147  | G                | A             | 0.297 | 0.042                 |
| 7   | rs201664599     | 139943702 | CT | C  | 0.453 |         | 0.950      | rs5887960:139943702:CT:C      | rs5887960   | CT               | C             | 0.538 | 0.058                 |
| 7   | rs62485509      | 144048902 | T  | G  | 0.200 |         | 0.887      | rs62485509:144048902:G:T      | rs62485509  | G                | T             | 0.228 | -0.056                |
| 8   | rs66823261      | 170692    | C  | T  | 0.216 |         | 0.969      | rs66823261:170692:T:C         | rs66823261  | T                | C             | 0.223 | 0.048                 |
| 8   | 8:17787610 CT C | 17787610  | CT | C  | 0.360 |         | 0.949      | rs3988353:17787610:CT:C       | rs3988353   | CT               | C             | 0.623 | -0.038                |
| 8   | rs1028016       | 23447496  | A  | G  | 0.375 |         | 0.998      | rs1028016:23447496:A:G        | rs1028016   | A                | G             | 0.649 | -0.039                |
| 8   | rs310295        | 23663653  | A  | C  | 0.421 |         | 0.994      | rs310295:23663653:C:A         | rs310295    | C                | A             | 0.403 | 0.034                 |
| 8   | rs9693444       | 29509616  | A  | C  | 0.325 | 106     |            | rs9693444:29509616:A:C        | rs9693444   | A                | C             | 0.676 | -0.060                |
| 8   | rs13365225      | 36858483  | G  | A  | 0.160 |         | 0.997      | rs13365225:36858483:A:G       | rs13365225  | A                | G             | 0.182 | -0.076                |
| 8   | rs1511243       | 76230943  | A  | G  | 0.177 |         | 0.999      | rs1511243:76230943:A:G        | rs1511243   | A                | G             | 0.828 | 0.076                 |
| 8   | rs72658084      | 76333056  | T  | C  | 0.091 |         | 0.991      | rs72658084:76333056:C:T       | rs72658084  | C                | T             | 0.088 | 0.113                 |
| 8   | rs1533366       | 76378165  | T  | G  | 0.361 |         | 0.996      | rs1533366:76378165:G:T        | rs1533366   | G                | T             | 0.360 | -0.039                |
| 8   | rs62517052      | 102483100 | C  | T  | 0.095 |         | 0.979      | rs62517052:102483100:T:C      | rs62517052  | T                | C             | 0.097 | 0.059                 |
| 8   | rs12546444      | 106358620 | T  | A  | 0.093 |         | 0.966      | rs12546444:106358620:A:T      | rs12546444  | A                | T             | 0.100 | -0.075                |
| 8   | rs13267382      | 117209548 | A  | G  | 0.345 |         | 0.985      | rs13267382:117209548:A:G      | rs13267382  | A                | G             | 0.645 | -0.042                |
| 8   | rs62526620      | 120862186 | G  | A  | 0.129 |         | 0.988      | rs62526620:120862186:A:G      | rs62526620  | A                | G             | 0.132 | 0.053                 |
| 8   | rs35542655      | 124563705 | C  | T  | 0.144 |         | 0.978      | rs35542655:124563705:T:C      | rs35542655  | T                | C             | 0.146 | 0.048                 |
| 8   | rs12541094      | 124571581 | A  | G  | 0.415 | 106     |            | rs12541094:124571581:G:A      | rs12541094  | G                | A             | 0.417 | 0.034                 |
| 8   | rs7842619       | 124739913 | G  | T  | 0.414 |         | 0.997      | rs7842619:124739913:T:G       | rs7842619   | T                | G             | 0.399 | 0.047                 |
| 8   | rs35961416      | 128213561 | CA | C  | 0.402 |         | 0.883      | rs35961416:128213561:C:C<br>A | rs35961416  | C                | CA            | 0.415 | -0.043                |
| 8   | rs12550713      | 128370949 | G  | C  | 0.401 |         | 0.999      | rs12550713:128370949:C:G      | rs12550713  | C                | G             | 0.402 | 0.064                 |
| 8   | rs10096351      | 128372172 | A  | G  | 0.457 |         | 0.999      | rs10096351:128372172:A:G      | rs10096351  | A                | G             | 0.545 | 0.060                 |
| 8   | rs1016578       | 129199566 | A  | G  | 0.177 |         | 0.997      | rs1016578:129199566:G:A       | rs1016578   | G                | A             | 0.172 | 0.062                 |
| 8   | rs7830152       | 143669254 | G  | A  | 0.336 |         | 0.984      | rs7830152:143669254:A:G       | rs7830152   | A                | G             | 0.339 | -0.035                |
| 9   | rs10975870      | 6880263   | G  | A  | 0.291 |         | 0.991      | rs10975870:6880263:A:G        | rs10975870  | A                | G             | 0.286 | 0.035                 |

eTable 2. 305 SNPs used in calculating the polygenic risk scores of the UK biobank females

| CHR | rs_id                | BP        | A1  | A2        | MAF   | QC-test | Info_score | phase3_1kg_id                  | rs_number   | reference_allele | effect_allele | eaf   | overall_breast_cancer |
|-----|----------------------|-----------|-----|-----------|-------|---------|------------|--------------------------------|-------------|------------------|---------------|-------|-----------------------|
| 9   | rs745322029          | 21964882  | C   | CAA<br>AA | 0.333 |         | 0.966      | rs3057314:21964882:CAAA<br>A:C | rs3057314   | CAAA<br>A        | C             | 0.318 | 0.055                 |
| 9   | rs17694493           | 22041998  | G   | C         | 0.133 |         | 0.982      | rs17694493:22041998:C:G        | rs17694493  | C                | G             | 0.139 | 0.029                 |
| 9   | rs4880038            | 36928288  | T   | C         | 0.443 |         | 1.000      | rs4880038:36928288:T:C         | rs4880038   | T                | C             | 0.535 | 0.025                 |
| 9   | rs665889             | 87782211  | T   | C         | 0.493 |         | 0.994      | rs665889:87782211:T:C          | rs665889    | T                | C             | 0.509 | 0.036                 |
| 9   | rs10120432           | 98362587  | C   | T         | 0.092 |         | 0.991      | rs10120432:98362587:T:C        | rs10120432  | T                | C             | 0.094 | 0.058                 |
| 9   | 9:110303808_TAA<br>T | 110303808 | T   | TAA       | 0.180 |         | 0.983      | rs60037937:110303808:TA<br>A:T | rs60037937  | TAA              | T             | 0.207 | 0.080                 |
| 9   | rs10816625           | 110837073 | G   | A         | 0.063 | 106     |            | rs10816625:110837073:A:G       | rs10816625  | A                | G             | 0.063 | 0.116                 |
| 9   | rs13294895           | 110837176 | T   | C         | 0.169 |         | 0.942      | rs13294895:110837176:C:T       | rs13294895  | C                | T             | 0.175 | 0.065                 |
| 9   | rs7848334            | 110849525 | G   | T         | 0.393 |         | 0.935      | rs7848334:110849525:G:T        | rs7848334   | G                | T             | 0.598 | 0.015                 |
| 9   | rs630965             | 110885479 | C   | T         | 0.384 |         | 0.996      | rs630965:110885479:C:T         | rs630965    | C                | T             | 0.622 | 0.088                 |
| 9   | rs1895062            | 119313486 | G   | A         | 0.407 |         | 0.993      | rs1895062:119313486:A:G        | rs1895062   | A                | G             | 0.409 | -0.046                |
| 9   | rs3861871            | 129424719 | G   | A         | 0.452 |         | 0.976      | rs3861871:129424719:A:G        | rs3861871   | A                | G             | 0.458 | -0.038                |
| 9   | rs550057             | 136146597 | T   | C         | 0.256 |         | 0.999      | 9:136146597:C:T                | rs550057    | C                | T             | 0.273 | 0.040                 |
| 10  | rs55910451           | 5794652   | G   | A         | 0.223 |         | 0.996      | rs55910451:5794652:A:G         | rs55910451  | A                | G             | 0.214 | 0.047                 |
| 10  | rs10796139           | 13892298  | A   | G         | 0.448 |         | 0.998      | rs10796139:13892298:G:A        | rs10796139  | G                | A             | 0.438 | 0.037                 |
| 10  | rs7072776            | 22032942  | A   | G         | 0.275 | 106     |            | rs7072776:22032942:A:G         | rs7072776   | A                | G             | 0.709 | -0.058                |
| 10  | rs762131501          | 22477776  | A   | ACC       | 0.016 |         | 0.980      | 10:22477776:ACC:A              | rs542275778 | ACC              | A             | 0.020 | 0.169                 |
| 10  | rs2384736            | 38523626  | A   | C         | 0.375 |         | 0.966      | rs2384736:38523626:C:A         | rs2384736   | C                | A             | 0.370 | 0.040                 |
| 10  | rs10995201           | 64299890  | G   | A         | 0.142 |         | 0.977      | rs10995201:64299890:A:G        | rs10995201  | A                | G             | 0.160 | -0.135                |
| 10  | rs6479868            | 64819996  | T   | G         | 0.195 |         | 0.989      | rs6479868:64819996:G:T         | rs6479868   | G                | T             | 0.196 | 0.047                 |
| 10  | rs111833376          | 71335574  | T   | C         | 0.316 |         | 0.958      | rs111833376:71335574:C:T       | rs111833376 | C                | T             | 0.318 | -0.040                |
| 10  | rs719338             | 80851257  | G   | T         | 0.405 |         | 0.991      | rs719338:80851257:G:T          | rs719338    | G                | T             | 0.617 | -0.081                |
| 10  | rs4980029            | 80886726  | G   | A         | 0.157 |         | 0.988      | rs4980029:80886726:A:G         | rs4980029   | A                | G             | 0.163 | 0.076                 |
| 10  | 10:95292187_CAA<br>C | 95292187  | CAA | C         | 0.181 |         | 0.964      | rs140936696:95292187:CA<br>A:C | rs140936696 | CAA              | C             | 0.823 | -0.051                |
| 10  | rs10885405           | 114777670 | T   | C         | 0.465 |         | 0.999      | rs10885405:114777670:C:T       | rs10885405  | C                | T             | 0.463 | 0.047                 |
| 10  | rs12250948           | 115128491 | T   | C         | 0.208 |         | 0.984      | rs12250948:115128491:T:C       | rs12250948  | T                | C             | 0.785 | -0.059                |
| 10  | rs9421410            | 123095209 | A   | G         | 0.314 |         | 0.988      | rs9421410:123095209:G:A        | rs9421410   | G                | A             | 0.327 | -0.054                |
| 10  | rs45631580           | 123340107 | G   | A         | 0.058 |         | 0.993      | rs45631580:123340107:A:G       | rs45631580  | A                | G             | 0.066 | 0.151                 |

eTable 2. 305 SNPs used in calculating the polygenic risk scores of the UK biobank females

| CHR | rs_id             | BP        | A1 | A2 | MAF   | QC-test | Info_score | phase3_1kg_id              | rs_number   | reference_allele | effect_allele | eaf   | overall_breast_cancer |
|-----|-------------------|-----------|----|----|-------|---------|------------|----------------------------|-------------|------------------|---------------|-------|-----------------------|
| 10  | 10:123340431_GC_G | 123340431 | GC | G  | 0.404 |         | 0.993      | rs35054928:123340431:GC:G  | rs35054928  | GC               | G             | 0.596 | -0.241                |
| 10  | rs45631563        | 123349324 | T  | A  | 0.043 |         | 0.975      | rs45631563:123349324:A:T   | rs45631563  | A                | T             | 0.048 | -0.261                |
| 11  | rs7394715         | 433617    | T  | C  | 0.207 |         | 0.993      | rs7394715:433617:T:C       | rs7394715   | T                | C             | 0.797 | -0.044                |
| 11  | rs6597981         | 803017    | A  | G  | 0.478 | 106     |            | rs6597981:803017:A:G       | rs6597981   | A                | G             | 0.517 | 0.046                 |
| 11  | rs4980386         | 1895708   | A  | C  | 0.378 |         | 0.995      | rs4980386:1895708:C:A      | rs4980386   | C                | A             | 0.392 | -0.076                |
| 11  | rs10832963        | 18664241  | T  | G  | 0.253 |         | 0.995      | rs10832963:18664241:T:G    | rs10832963  | T                | G             | 0.729 | 0.046                 |
| 11  | rs4472923         | 42844441  | T  | C  | 0.330 |         | 0.998      | rs4472923:42844441:C:T     | rs4472923   | C                | T             | 0.328 | -0.034                |
| 11  | rs10838267        | 44368892  | G  | A  | 0.455 |         | 0.992      | rs10838267:44368892:G:A    | rs10838267  | G                | A             | 0.550 | 0.037                 |
| 11  | rs77047825        | 46318032  | G  | C  | 0.071 |         | 0.976      | rs77047825:46318032:C:G    | rs77047825  | C                | G             | 0.066 | -0.075                |
| 11  | rs12287832        | 65553492  | A  | C  | 0.192 |         | 0.995      | rs12287832:65553492:C:A    | rs12287832  | C                | A             | 0.187 | 0.043                 |
| 11  | rs10896047        | 65572431  | A  | G  | 0.472 |         | 0.988      | rs10896047:65572431:G:A    | rs10896047  | G                | A             | 0.489 | -0.035                |
| 11  | rs35039974        | 69328130  | T  | A  | 0.200 |         | 0.981      | rs35039974:69328130:A:T    | rs35039974  | A                | T             | 0.213 | -0.042                |
| 11  | rs661204          | 69330983  | A  | G  | 0.119 |         | 0.991      | rs661204:69330983:G:A      | rs661204    | G                | A             | 0.125 | 0.102                 |
| 11  | rs78540526        | 69331418  | T  | C  | 0.071 |         | 0.988      | rs78540526:69331418:C:T    | rs78540526  | C                | T             | 0.075 | 0.178                 |
| 11  | rs7125780         | 103614438 | T  | G  | 0.356 |         | 0.992      | rs7125780:103614438:T:G    | rs7125780   | T                | G             | 0.657 | 0.015                 |
| 11  | rs199504893       | 108267402 | CA | C  | 0.408 |         | 0.999      | rs199504893:108267402:C:CA | rs199504893 | C                | CA            | 0.417 | -0.002                |
| 11  | rs610437          | 111696440 | T  | C  | 0.379 |         | 0.999      | rs610437:111696440:T:C     | rs610437    | T                | C             | 0.622 | -0.040                |
| 11  | rs625145          | 116727936 | T  | A  | 0.188 |         | 0.999      | rs625145:116727936:A:T     | rs625145    | A                | T             | 0.205 | -0.042                |
| 11  | rs7121616         | 122966626 | G  | A  | 0.281 |         | 0.997      | rs7121616:122966626:A:G    | rs7121616   | A                | G             | 0.292 | -0.038                |
| 11  | rs7939702         | 129243417 | T  | G  | 0.142 |         | 0.985      | rs7939702:129243417:T:G    | rs7939702   | T                | G             | 0.862 | -0.054                |
| 11  | rs11822830        | 129461016 | A  | G  | 0.415 | 106     |            | rs11822830:129461016:A:G   | rs11822830  | A                | G             | 0.602 | 0.045                 |
| 12  | rs797736          | 293626    | G  | A  | 0.368 |         | 0.995      | 12:293626:A:G              | rs797736    | A                | G             | 0.371 | 0.040                 |
| 12  | rs12422552        | 14413931  | C  | G  | 0.266 | 106     |            | 12:14413931:G:C            | rs12422552  | G                | C             | 0.262 | 0.048                 |
| 12  | rs788458          | 28149568  | T  | C  | 0.124 |         | 0.997      | 12:28149568:C:T            | rs788458    | C                | T             | 0.117 | -0.062                |
| 12  | rs7297051         | 28174817  | T  | C  | 0.228 |         | 0.969      | 12:28174817:C:T            | rs7297051   | C                | T             | 0.242 | -0.086                |
| 12  | rs11049431        | 28347382  | T  | C  | 0.222 |         | 0.976      | 12:28347382:C:T            | rs11049431  | C                | T             | 0.215 | -0.052                |
| 12  | rs1027113         | 29140260  | G  | A  | 0.076 |         | 0.988      | 12:29140260:G:A            | rs1027113   | G                | A             | 0.913 | 0.065                 |
| 12  | rs2277339         | 57146069  | G  | T  | 0.103 | 106     |            | 12:57146069:T:G            | rs2277339   | T                | G             | 0.104 | -0.058                |
| 12  | rs2870876         | 70798355  | T  | A  | 0.187 |         | 0.996      | 12:70798355:A:T            | rs2870876   | A                | T             | 0.181 | 0.047                 |
| 12  | rs111622698       | 83064195  | GA | G  | 0.102 |         | 0.966      | 12:83064195:G:GA           | rs111622698 | G                | GA            | 0.099 | 0.067                 |

eTable 2. 305 SNPs used in calculating the polygenic risk scores of the UK biobank females

| CHR | rs_id                   | BP        | A1         | A2 | MAF   | QC-test | Info_score | phase3_1kg_id              | rs_number   | reference_allele | effect_allele | eaf   | overall_breast_cancer |
|-----|-------------------------|-----------|------------|----|-------|---------|------------|----------------------------|-------------|------------------|---------------|-------|-----------------------|
| 12  | rs10862899              | 85004551  | C          | T  | 0.490 |         | 0.997      | 12:85004551:C:T            | rs10862899  | C                | T             | 0.496 | 0.035                 |
| 12  | rs17356907              | 96027759  | G          | A  | 0.304 | 106     |            | 12:96027759:A:G            | rs17356907  | A                | G             | 0.296 | -0.087                |
| 12  | rs7132703               | 103097887 | T          | C  | 0.114 |         | 0.987      | 12:103097887:C:T           | rs7132703   | C                | T             | 0.118 | 0.055                 |
| 12  | rs11065822              | 111600134 | T          | G  | 0.348 |         | 0.948      | 12:111600134:G:T           | rs11065822  | G                | T             | 0.372 | -0.044                |
| 12  | rs1061657               | 115108136 | C          | T  | 0.257 | 106     |            | 12:115108136:T:C           | rs1061657   | T                | C             | 0.262 | 0.047                 |
| 12  | rs11067551              | 115796577 | G          | A  | 0.194 | 106     |            | 12:115796577:A:G           | rs11067551  | A                | G             | 0.196 | -0.043                |
| 12  | rs2454399               | 115835836 | C          | T  | 0.422 |         | 0.993      | 12:115835836:T:C           | rs2454399   | T                | C             | 0.417 | -0.081                |
| 12  | rs206966                | 120832146 | T          | C  | 0.143 |         | 0.927      | 12:120832146:C:T           | rs206966    | C                | T             | 0.159 | 0.052                 |
| 13  | rs56404467              | 32839990  | A          | G  | 0.016 |         | 0.903      | rs56404467:32839990:G:A    | rs56404467  | G                | A             | 0.017 | 0.042                 |
| 13  | rs11571833              | 32972626  | T          | A  | 0.009 | 106     |            | rs11571833:32972626:A:T    | rs11571833  | A                | T             | 0.008 | 0.269                 |
| 13  | rs9315973               | 43501356  | A          | G  | 0.168 |         | 0.982      | rs9315973:43501356:A:G     | rs9315973   | A                | G             | 0.830 | 0.052                 |
| 13  | rs12870942              | 73806982  | C          | T  | 0.322 |         | 0.994      | rs12870942:73806982:T:C    | rs12870942  | T                | C             | 0.315 | 0.035                 |
| 13  | rs2181965               | 73960952  | A          | G  | 0.241 |         | 0.998      | rs2181965:73960952:A:G     | rs2181965   | A                | G             | 0.762 | 0.040                 |
| 14  | rs34914085              | 37128564  | A          | C  | 0.210 |         | 0.993      | rs34914085:37128564:C:A    | rs34914085  | C                | A             | 0.212 | -0.073                |
| 14  | rs2253012               | 37228504  | T          | C  | 0.440 |         | 0.990      | rs2253012:37228504:C:T     | rs2253012   | C                | T             | 0.443 | 0.039                 |
| 14  | rs2588809               | 68660428  | T          | C  | 0.156 | 106     |            | rs2588809:68660428:T:C     | rs2588809   | T                | C             | 0.835 | -0.047                |
| 14  | rs11624333              | 68979835  | C          | T  | 0.282 |         | 0.980      | rs11624333:68979835:T:C    | rs11624333  | T                | C             | 0.258 | -0.091                |
| 14  | 14:91751788_TC T        | 91751788  | TC         | T  | 0.313 |         | 0.983      | rs11341843:91751788:TC:T   | rs11341843  | TC               | T             | 0.693 | 0.038                 |
| 14  | rs941764                | 91841069  | G          | A  | 0.342 | 106     |            | rs941764:91841069:A:G      | rs941764    | A                | G             | 0.344 | 0.051                 |
| 14  | rs78440108              | 93070286  | T          | C  | 0.175 |         | 0.974      | rs78440108:93070286:C:T    | rs78440108  | C                | T             | 0.171 | -0.058                |
| 14  | rs4983544               | 105213978 | G          | T  | 0.446 |         | 0.992      | rs4983544:105213978:T:G    | rs4983544   | T                | G             | 0.459 | 0.040                 |
| 15  | rs187010898             | 46680811  | A          | C  | 0.012 |         | 0.966      | rs187010898:46680811:C:A   | rs187010898 | C                | A             | 0.012 | -0.197                |
| 15  | rs4774565               | 50694306  | G          | A  | 0.326 |         | 0.974      | rs4774565:50694306:A:G     | rs4774565   | A                | G             | 0.345 | -0.042                |
| 15  | rs8042593               | 66630569  | G          | A  | 0.351 |         | 0.999      | rs8042593:66630569:G:A     | rs8042593   | G                | A             | 0.641 | -0.037                |
| 15  | rs35874463              | 67457698  | G          | A  | 0.058 | 106     |            | rs35874463:67457698:A:G    | rs35874463  | A                | G             | 0.050 | 0.078                 |
| 15  | rs8035987               | 75750383  | C          | T  | 0.250 |         | 0.985      | rs8035987:75750383:T:C     | rs8035987   | T                | C             | 0.260 | -0.041                |
| 15  | rs2290202               | 91512267  | T          | G  | 0.128 |         | 0.994      | rs2290202:91512267:G:T     | rs2290202   | G                | T             | 0.135 | -0.059                |
| 15  | rs144767203             | 100905819 | C          | A  | 0.107 |         | 0.992      | rs144767203:100905819:A:C  | rs144767203 | A                | C             | 0.110 | -0.061                |
| 16  | 16:4008542_CAAA<br>AA C | 4008542   | CAA<br>AAA | C  | 0.168 |         | 0.950      | rs57920543:4008542:CAAAA:C | rs57920543  | CAAAA<br>AA      | C             | 0.821 | -0.033                |
| 16  | rs11076805              | 4106788   | A          | C  | 0.262 |         | 0.971      | rs11076805:4106788:C:A     | rs11076805  | C                | A             | 0.264 | -0.030                |

eTable 2. 305 SNPs used in calculating the polygenic risk scores of the UK biobank females

| CHR | rs_id            | BP       | A1 | A2 | MAF   | QC-test | Info_score | phase3_1kg_id            | rs_number   | reference_allele | effect_allele | eaf   | overall_breast_cancer |
|-----|------------------|----------|----|----|-------|---------|------------|--------------------------|-------------|------------------|---------------|-------|-----------------------|
| 16  | rs12709163       | 6963972  | C  | G  | 0.188 |         | 0.964      | rs12709163:6963972:C:G   | rs12709163  | C                | G             | 0.784 | 0.035                 |
| 16  | rs34872983       | 10706580 | A  | G  | 0.061 |         | 0.984      | rs34872983:10706580:G:A  | rs34872983  | G                | A             | 0.070 | -0.074                |
| 16  | rs75753503       | 23007047 | T  | G  | 0.022 |         | 0.982      | rs75753503:23007047:G:T  | rs75753503  | G                | T             | 0.024 | 0.122                 |
| 16  | rs35668161       | 52538825 | A  | C  | 0.249 |         | 0.992      | rs35668161:52538825:C:A  | rs35668161  | C                | A             | 0.256 | 0.115                 |
| 16  | rs4784227        | 52599188 | T  | C  | 0.239 | 106     |            | rs4784227:52599188:C:T   | rs4784227   | C                | T             | 0.241 | 0.107                 |
| 16  | rs55872725       | 53809123 | T  | C  | 0.401 |         | 1.000      | rs55872725:53809123:C:T  | rs55872725  | C                | T             | 0.420 | -0.070                |
| 16  | rs6499648        | 53861139 | C  | T  | 0.227 |         | 0.997      | rs6499648:53861139:C:T   | rs6499648   | C                | T             | 0.760 | -0.034                |
| 16  | rs7184573        | 53861592 | A  | G  | 0.373 |         | 0.979      | rs7184573:53861592:G:A   | rs7184573   | G                | A             | 0.366 | -0.034                |
| 16  | rs28539243       | 54682064 | A  | G  | 0.488 | 106     |            | rs28539243:54682064:G:A  | rs28539243  | G                | A             | 0.485 | 0.048                 |
| 16  | rs7500067        | 80648296 | G  | A  | 0.222 |         | 0.994      | rs7500067:80648296:A:G   | rs7500067   | A                | G             | 0.230 | 0.084                 |
| 16  | rs9931038        | 85145977 | C  | T  | 0.487 | 106     |            | rs9931038:85145977:T:C   | rs9931038   | T                | C             | 0.486 | -0.021                |
| 16  | rs12449271       | 87086492 | C  | T  | 0.253 |         | 0.989      | rs12449271:87086492:T:C  | rs12449271  | T                | C             | 0.259 | -0.047                |
| 17  | rs79461387       | 29168077 | T  | G  | 0.260 |         | 0.986      | rs79461387:29168077:G:T  | rs79461387  | G                | T             | 0.261 | -0.057                |
| 17  | rs150537328      | 39251123 | C  | T  | 0.062 |         | 0.955      | rs150537328:39251123:T:C | rs150537328 | T                | C             | 0.068 | 0.080                 |
| 17  | rs11296          | 40127060 | C  | T  | 0.051 |         | 0.942      | rs11296:40127060:T:C     | rs11296     | T                | C             | 0.057 | 0.017                 |
| 17  | rs17881320       | 40485239 | T  | G  | 0.089 |         | 0.987      | rs17881320:40485239:G:T  | rs17881320  | G                | T             | 0.087 | -0.057                |
| 17  | rs149370081      | 40744470 | A  | G  | 0.015 |         | 0.987      | rs149370081:40744470:G:A | rs149370081 | G                | A             | 0.012 | 0.202                 |
| 17  | rs545502941      | 43212339 | CT | C  | 0.211 |         | 0.973      | rs71363517:43212339:C:CT | rs71363517  | C                | CT            | 0.228 | 0.044                 |
| 17  | rs2668667        | 44283858 | A  | G  | 0.132 |         | 0.864      | 17:44283858:G:A          | rs2668667   | G                | A             | 0.190 | -0.054                |
| 17  | rs2787486        | 53209774 | C  | A  | 0.314 |         | 0.991      | rs2787486:53209774:A:C   | rs2787486   | A                | C             | 0.302 | -0.079                |
| 17  | rs745570         | 77781725 | A  | G  | 0.485 |         | 0.999      | rs745570:77781725:A:G    | rs745570    | A                | G             | 0.504 | -0.040                |
| 18  | rs16976596       | 11696613 | T  | C  | 0.126 |         | 0.968      | rs16976596:11696613:C:T  | rs16976596  | C                | T             | 0.138 | -0.038                |
| 18  | rs11665269       | 20634253 | C  | T  | 0.368 |         | 0.980      | rs11665269:20634253:C:T  | rs11665269  | C                | T             | 0.640 | -0.042                |
| 18  | rs1111207        | 24125857 | C  | T  | 0.431 |         | 0.996      | rs1111207:24125857:T:C   | rs1111207   | T                | C             | 0.421 | 0.035                 |
| 18  | rs527616         | 24337424 | C  | G  | 0.360 | 106     |            | rs527616:24337424:C:G    | rs527616    | C                | G             | 0.621 | 0.046                 |
| 18  | 18:24518050_AT_A | 24518050 | A  | AT | 0.287 |         | 0.989      | rs35369219:24518050:AT:A | rs35369219  | AT               | A             | 0.277 | -0.060                |
| 18  | rs8092192        | 25407513 | C  | G  | 0.295 |         | 0.992      | rs8092192:25407513:C:G   | rs8092192   | C                | G             | 0.713 | 0.040                 |
| 18  | rs72931898       | 29981526 | A  | G  | 0.044 |         | 0.993      | rs72931898:29981526:G:A  | rs72931898  | G                | A             | 0.047 | -0.106                |
| 18  | rs9954058        | 42411803 | C  | G  | 0.079 |         | 0.995      | rs9954058:42411803:G:C   | rs9954058   | G                | C             | 0.072 | -0.088                |
| 18  | rs9952980        | 42888797 | C  | T  | 0.356 |         | 0.976      | rs9952980:42888797:T:C   | rs9952980   | T                | C             | 0.352 | -0.054                |
| 19  | rs117922601      | 13249921 | T  | G  | 0.056 |         | 0.993      | rs117922601:13249921:G:T | rs117922601 | G                | T             | 0.051 | 0.096                 |

eTable 2. 305 SNPs used in calculating the polygenic risk scores of the UK biobank females

| CHR | rs_id            | BP       | A1         | A2 | MAF   | QC-test | Info_score | phase3_1kg_id                     | rs_number   | reference_allele | effect_allele | eaf   | overall_breast_cancer |
|-----|------------------|----------|------------|----|-------|---------|------------|-----------------------------------|-------------|------------------|---------------|-------|-----------------------|
| 19  | rs56069439       | 17393925 | A          | C  | 0.295 |         | 1.000      | rs56069439:17393925:C:A           | rs56069439  | C                | A             | 0.296 | 0.038                 |
| 19  | rs10164323       | 18569492 | T          | C  | 0.354 |         | 0.999      | rs10164323:18569492:C:T           | rs10164323  | C                | T             | 0.348 | -0.072                |
| 19  | rs140702307      | 19517054 | CGG<br>GCG | C  | 0.355 |         | 0.998      | rs140702307:19517054:C:C<br>GGGCG | rs140702307 | C                | CGG<br>GCG    | 0.354 | 0.044                 |
| 19  | rs56681946       | 44283031 | C          | T  | 0.378 |         | 0.998      | rs56681946:44283031:T:C           | rs56681946  | T                | C             | 0.352 | 0.062                 |
| 19  | rs4399645        | 46166073 | T          | C  | 0.409 |         | 0.983      | rs4399645:46166073:T:C            | rs4399645   | T                | C             | 0.607 | -0.036                |
| 19  | rs1172821        | 55816678 | T          | C  | 0.372 | 106     |            | rs1172821:55816678:C:T            | rs1172821   | C                | T             | 0.363 | -0.036                |
| 20  | rs16991615       | 5948227  | A          | G  | 0.065 | 106     |            | rs16991615:5948227:G:A            | rs16991615  | G                | A             | 0.063 | 0.076                 |
| 20  | rs1154723        | 11379842 | T          | C  | 0.051 | 106     |            | rs1154723:11379842:T:C            | rs1154723   | T                | C             | 0.948 | 0.084                 |
| 20  | rs6030585        | 41613706 | C          | G  | 0.202 |         | 0.979      | rs6030585:41613706:C:G            | rs6030585   | C                | G             | 0.793 | 0.032                 |
| 20  | rs13039563       | 52296849 | A          | G  | 0.240 |         | 0.987      | rs13039563:52296849:G:A           | rs13039563  | G                | A             | 0.240 | 0.044                 |
| 21  | rs2822999        | 16364756 | G          | T  | 0.180 |         | 0.991      | rs2822999:16364756:T:G            | rs2822999   | T                | G             | 0.173 | 0.065                 |
| 21  | rs2823130        | 16566350 | G          | A  | 0.087 | 106     |            | rs2823130:16566350:A:G            | rs2823130   | A                | G             | 0.087 | 0.060                 |
| 21  | rs2403907        | 16574455 | A          | C  | 0.314 |         | 0.992      | rs2403907:16574455:C:A            | rs2403907   | C                | A             | 0.317 | -0.071                |
| 21  | rs4818836        | 47762932 | A          | G  | 0.031 |         | 0.976      | rs4818836:47762932:G:A            | rs4818836   | G                | A             | 0.036 | 0.095                 |
| 22  | rs9798754        | 19766137 | T          | C  | 0.365 |         | 0.986      | rs9798754:19766137:C:T            | rs9798754   | C                | T             | 0.380 | -0.037                |
| 22  | rs17879961       | 29121087 | G          | A  | 0.000 | 106     |            | rs17879961:29121087:A:G           | rs17879961  | A                | G             | 0.005 | 0.184                 |
| 22  | rs5997390        | 29135543 | A          | G  | 0.080 |         | 0.992      | rs5997390:29135543:G:A            | rs5997390   | G                | A             | 0.087 | 0.065                 |
| 22  | rs34134147       | 29203724 | T          | C  | 0.021 |         | 0.981      | rs34134147:29203724:C:T           | rs34134147  | C                | T             | 0.021 | 0.141                 |
| 22  | rs132289         | 29551872 | A          | G  | 0.020 |         | 0.948      | rs132289:29551872:A:G             | rs132289    | A                | G             | 0.985 | -0.172                |
| 22  | rs5750715        | 39343916 | A          | T  | 0.251 |         | 0.990      | rs5750715:39343916:T:A            | rs5750715   | T                | A             | 0.254 | 0.041                 |
| 22  | 22:40904707 CT C | 40904707 | C          | CT | 0.093 |         | 0.984      | rs66987842:40904707:CT:C          | rs66987842  | CT               | C             | 0.110 | 0.115                 |
| 22  | rs9611990        | 43433100 | T          | C  | 0.121 |         | 0.990      | rs9611990:43433100:C:T            | rs9611990   | C                | T             | 0.114 | -0.060                |
| 22  | rs112855987      | 45319953 | A          | G  | 0.420 |         | 0.983      | rs112855987:45319953:G:A          | rs112855987 | G                | A             | 0.417 | -0.013                |
| 22  | rs28512361       | 46283297 | A          | G  | 0.105 |         | 0.985      | rs28512361:46283297:G:A           | rs28512361  | G                | A             | 0.112 | 0.074                 |

rs\_id Genetic variant identifier  
 BP Build 37 position  
 A1 Minor allele  
 MAF Minor allele frequency  
 QC-test Result of marker-based QC test by UKBiobank (See Marker-based QC, 2.1.4 in QC report) for directly genotyped variants

|                                                                |                                                                                  |
|----------------------------------------------------------------|----------------------------------------------------------------------------------|
| Info_score                                                     | Information score for imputed variants                                           |
| phase3_1kg_id                                                  | Identifier from Phase 3 of 1000 Genomes                                          |
| Variables taken from Mavaddat <i>et al.</i> (2019) study [38]: |                                                                                  |
| reference_allele                                               |                                                                                  |
| effect_allele                                                  |                                                                                  |
| eaf                                                            | Effect Allele frequency estimates for controls in the complete Oncoarray dataset |
| overall_breast_cancer                                          | Coefficients for best model for overall breast cancer                            |
